# Supplementary material for: Reforming of methane with carbon dioxide over cerium oxide promoted nickel nanoparticles deposited on 4-channel hollow fibers by atomic layer deposition
Source: Royal Society of Chemistry journal article supplement (doi:10.1039/d0cy00039f), 2020-01-01
Supplement: d0cy00039f1.pdf [file d0cy00039f1.pdf]

## Supporting Information

### **Reforming of methane with carbon dioxide over cerium oxide promoted nickel nanoparticles deposited on 4-channel hollow fibers by atomic layer deposition**

Baitang Jin,<sup>a</sup> Zeyu Shang,<sup>a</sup> Shiguang Li,<sup>b</sup> Ying-Bing Jiang,<sup>c</sup> Xuehong Gu,<sup>d</sup> and Xinhua Liang<sup>\*a</sup>

<sup>a</sup> *Department of Chemical and Biochemical Engineering, Missouri University of Science and Technology, Rolla, Missouri 65409, United States*

<sup>b</sup> *Gas Technology Institute, 1700 South Mount Prospect Road, Des Plaines, IL 60018, United States*

<sup>c</sup> *TEM Laboratory, University of New Mexico, Albuquerque, New Mexico 87131, United States*

<sup>d</sup> *State Key Laboratory of Materials-Oriented Chemical Engineering, College of Chemistry and Chemical Engineering, Nanjing Tech University, 5 Ximofan Road, Nanjing 210009, P.R. China*

\* Corresponding author. Email: [liangxin@mst.edu](mailto:liangxin@mst.edu)

## Experimental

$\text{NiAl}_2\text{O}_4$  was synthesized by the co-precipitation method following the method in Referenc.<sup>1</sup> An aqueous solution of  $\text{Ni}(\text{NO}_3)_2 \cdot 6\text{H}_2\text{O}$  and  $\text{Al}(\text{NO}_3)_3 \cdot 9\text{H}_2\text{O}$  was mixed with ammonium hydroxide drop by drop. After filtration, the sample was washed with deionized water, dried in an oven at 100 °C for 12 h, and calcined in air at 900 °C for 5 h to obtain  $\text{NiAl}_2\text{O}_4$ .

$\text{CeO}_2\text{-NiAl}_2\text{O}_4$  (with 5 wt.% Ce) was synthesized by the incipient wetness (IW) method. The synthesized  $\text{NiAl}_2\text{O}_4$  was added to an aqueous solution of  $\text{Ce}(\text{NO}_3)_3 \cdot 6\text{H}_2\text{O}$  and dried at 100 °C, followed by calcination in air at 500 °C for 5 h.

$\text{Ce/Al}_2\text{O}_3$  (with 1.5 wt.% Ce) was synthesized by the incipient wetness method.  $\text{Al}_2\text{O}_3$  was added to an aqueous solution of  $\text{Ce}(\text{NO}_3)_3 \cdot 6\text{H}_2\text{O}$  and dried at 100 °C, followed by calcination in air at 500 °C for 5 h.

$\text{NiO}$  was synthesized by calcining  $\text{Ni}(\text{NO}_3)_2 \cdot 6\text{H}_2\text{O}$  in air at 500 °C for 3 h.

To compare the effects of reduction temperature,  $\text{Ni/Al}_2\text{O}_3\text{NP-ALD}$  was calcined in air at 500 °C for 3 h (using the same calcination procedure as the IW method for  $\text{CeNi/Al}_2\text{O}_3\text{NP-ALD}$ ). This sample was named as  $\text{cal-Ni/Al}_2\text{O}_3\text{NP-ALD}$ .

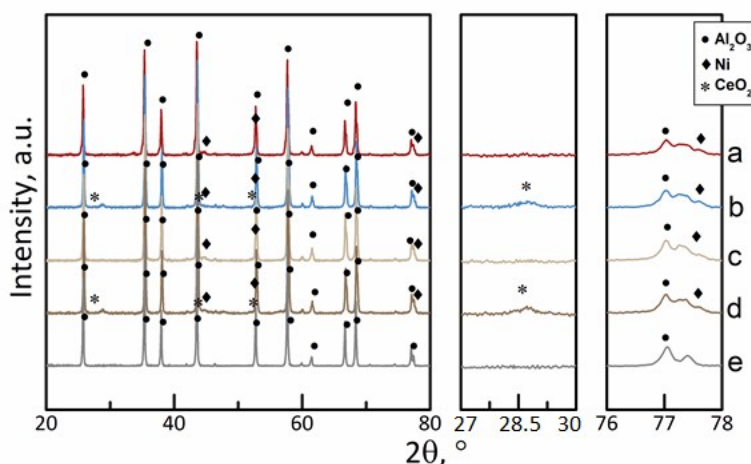

**Figure S1.** XRD patterns of reduced (a)  $\text{Ni/Al}_2\text{O}_3\text{NP-ALD}$ , (b)  $\text{CeNi/Al}_2\text{O}_3\text{NP-ALD}$ , (c)  $\text{Ni/Al}_2\text{O}_3\text{NP-IW}$ , (d)  $\text{CeNi/Al}_2\text{O}_3\text{NP-IW}$ , and (e)  $\text{Al}_2\text{O}_3\text{NP}$ .

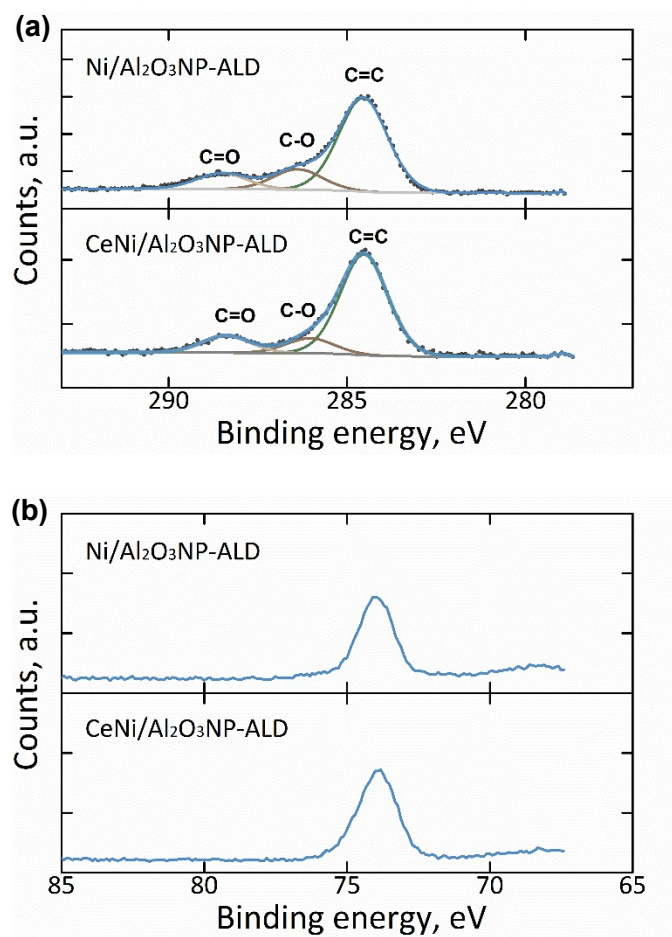

**Figure S2.** XPS core levels of (a) C 1s and (b) Al 2p of Ni/Al<sub>2</sub>O<sub>3</sub>NP-ALD and CeNi/Al<sub>2</sub>O<sub>3</sub>NP-ALD.

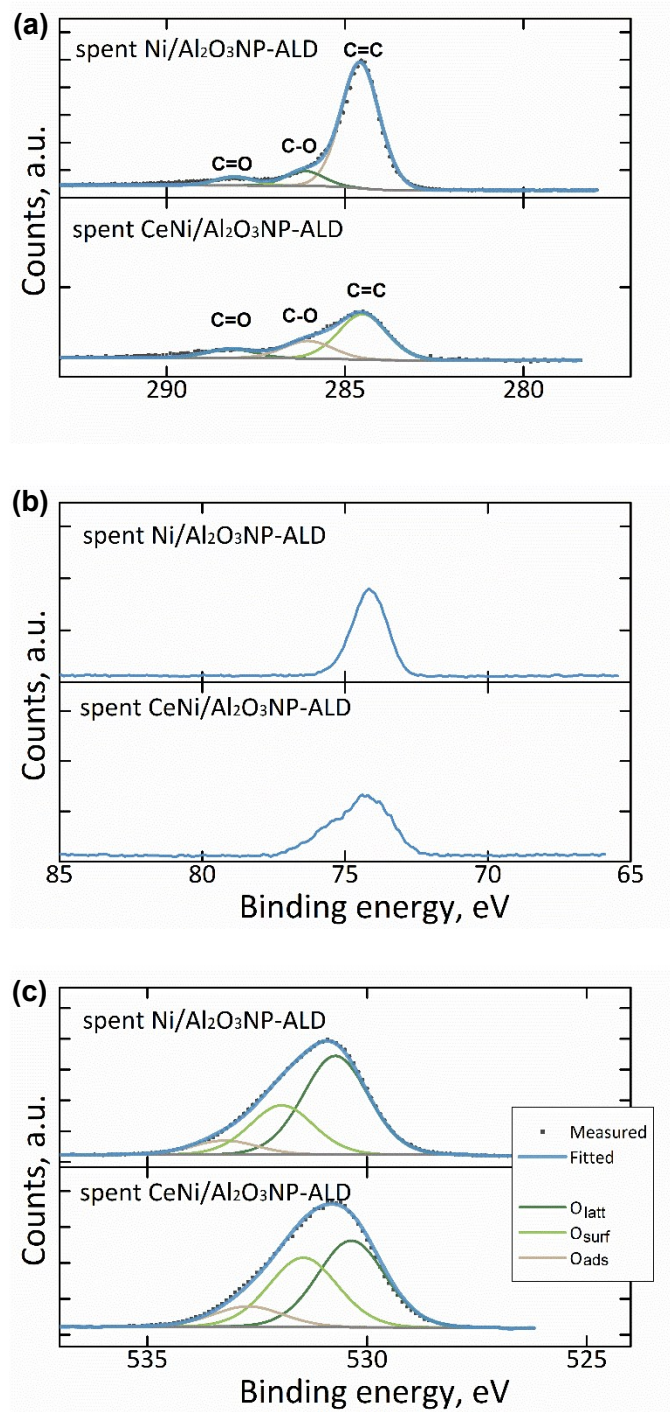

**Figure S3.** XPS core levels of (a) C 1s, (b) Al 2p, and (c) O 1s of spent Ni/Al<sub>2</sub>O<sub>3</sub>NP-ALD and spent CeNi/Al<sub>2</sub>O<sub>3</sub>NP-ALD samples after DRM at 850 °C for 72 h.

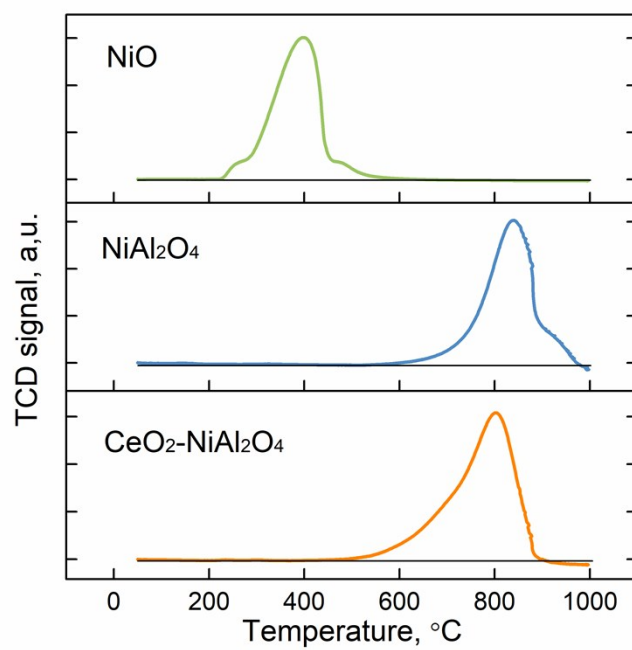

**Figure S4.** H<sub>2</sub>-TPR profiles of NiO, NiAl<sub>2</sub>O<sub>4</sub>, and CeO<sub>2</sub>-NiAl<sub>2</sub>O<sub>4</sub>.

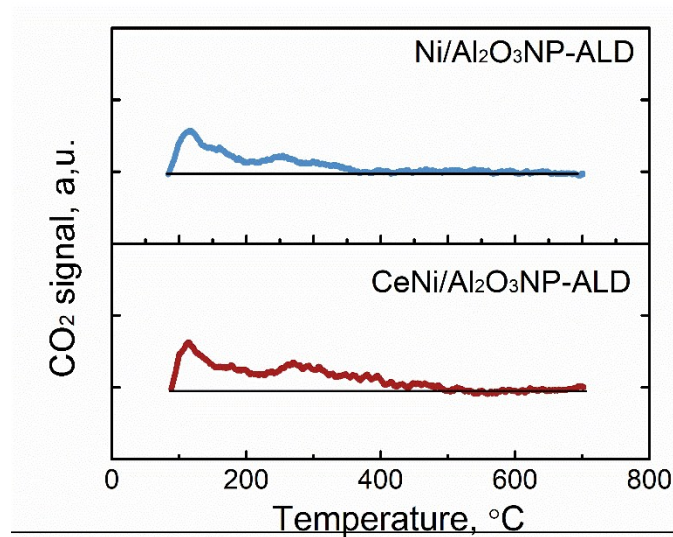

**Figure S5.** CO<sub>2</sub>-TPD of Ni/Al<sub>2</sub>O<sub>3</sub>NP-ALD and CeNi/Al<sub>2</sub>O<sub>3</sub>NP-ALD.

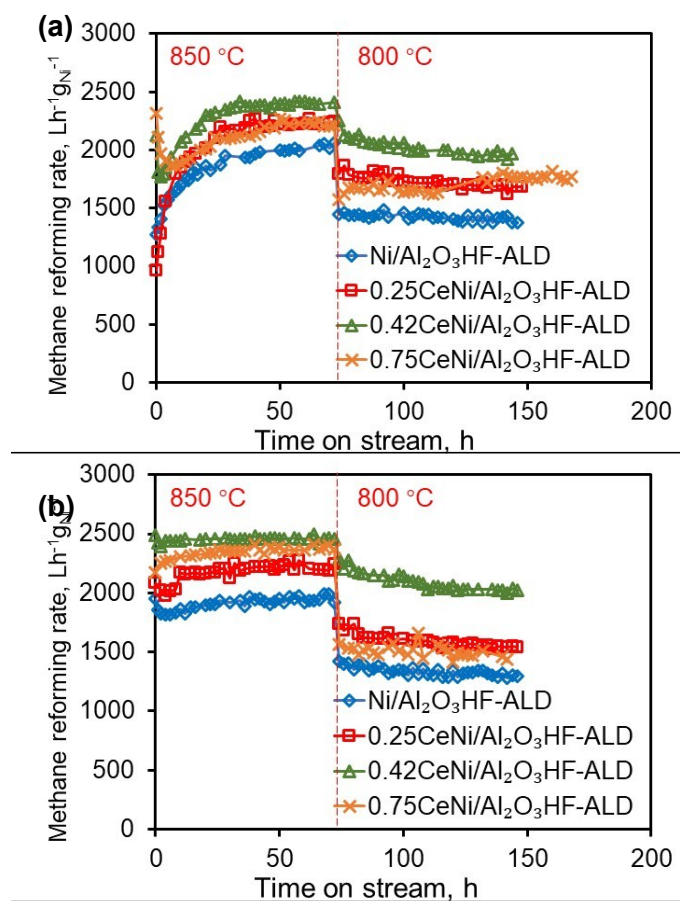

**Figure S6.** Methane reforming rate of (a) the first cycle and (b) the second cycle of dry reforming of methane reactions catalyzed by  $\text{Ni/Al}_2\text{O}_3\text{HF-ALD}$ ,  $0.25\text{CeNi/Al}_2\text{O}_3\text{HF-ALD}$ ,  $0.42\text{CeNi/Al}_2\text{O}_3\text{HF-ALD}$ , and  $0.75\text{CeNi/Al}_2\text{O}_3\text{HF-ALD}$ . Reaction conditions: catalyst loading of 0.6 g, 0.11 wt.% Ni, reactant composition of  $\text{CH}_4/\text{CO}_2=50/50$  vol. %, and total flow rate of 60 mL/min.

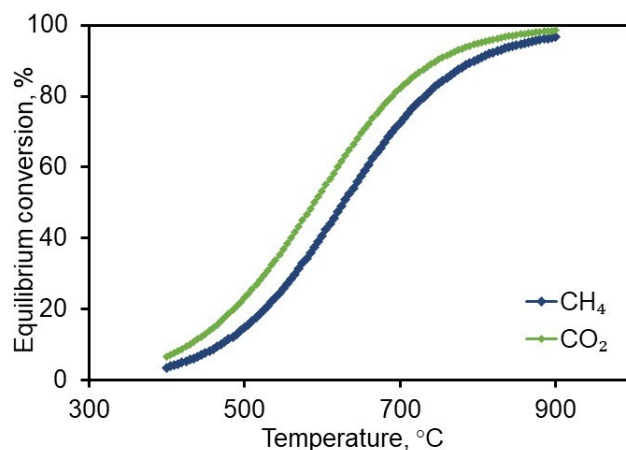

**Figure S7.** Thermodynamic equilibrium conversion of CO<sub>2</sub> and CH<sub>4</sub> as a function of temperature with an inlet mole ratio of CH<sub>4</sub>/CO<sub>2</sub>=1 at atmosphere pressure.

Thermodynamic equilibrium conversions of CH<sub>4</sub> and CO<sub>2</sub> were calculated with the RGibbs reactor module, using AspenONE 10 with SRK as the equation of state. CH<sub>4</sub>, CO<sub>2</sub>, CO, H<sub>2</sub>, and H<sub>2</sub>O were involved in the system. Assumptions were made that there was no carbon formation in the reaction system and there was no pressure drop for the RGibbs reactor. Inlet gas was set as CH<sub>4</sub>/CO<sub>2</sub>=1 (mole ratio) and the pressure was set at atmosphere pressure. Because there was only negligible amount of carbon deposition in our experiment, the carbon deposition was not considered in this calculation. In addition, other theoretical by-product species, such as CH<sub>3</sub>OH or C<sub>2</sub>H<sub>6</sub>, were not detected in our GC, so these species were not considered in the equilibrium calculation either. By minimizing the Gibbs free energy of the system, the equilibrium conversions of CH<sub>4</sub> and CO<sub>2</sub> were calculated.



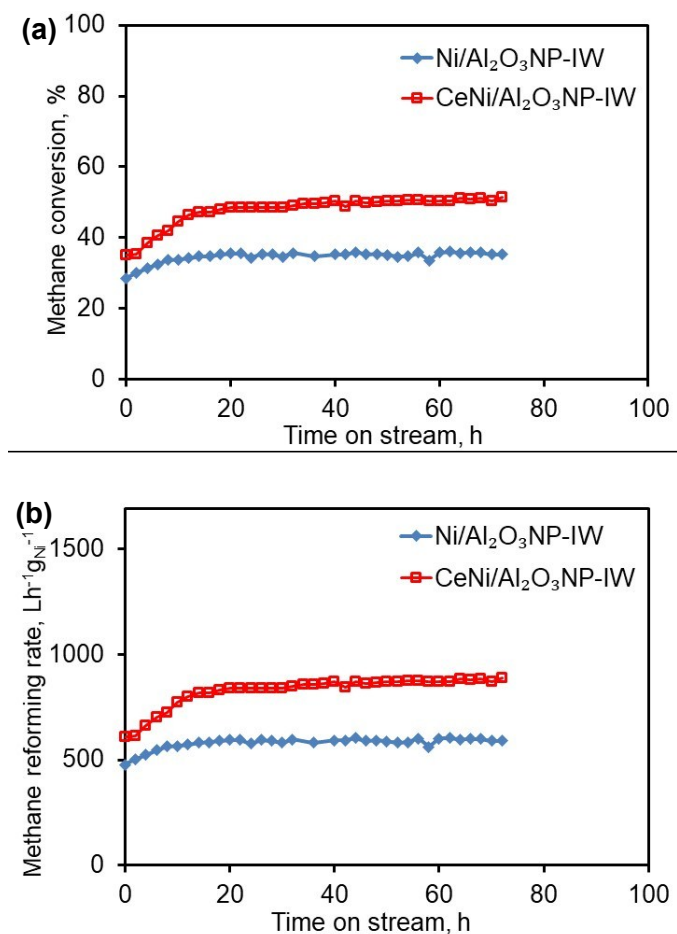

**Figure S8.** (a) Methane conversion and (b) methane reforming rate of the dry reforming of methane reactions catalyzed by CeNi/Al<sub>2</sub>O<sub>3</sub>NP-IW and Ni/Al<sub>2</sub>O<sub>3</sub>NP-IW at 850 °C. Reaction conditions: catalyst loading of 0.070 g, 1.50 wt.% Ni, reactant composition of CH<sub>4</sub>/CO<sub>2</sub>=50/50 vol. %, and total flow rate of 60 mL/min.

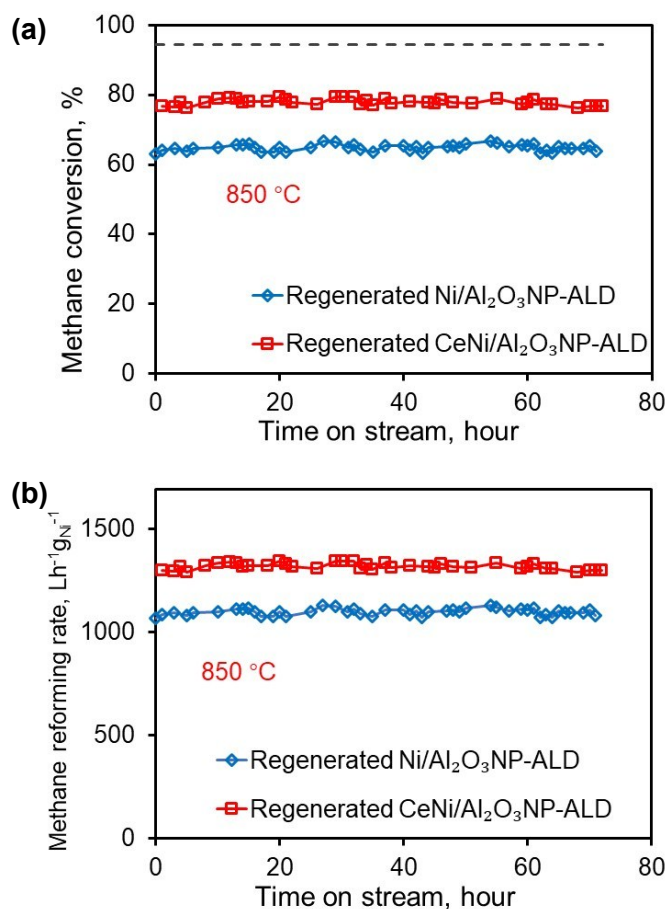

**Figure S9.** (a) Methane conversion and (b) methane reforming rate of the second cycle of dry reforming of methane reactions catalyzed by regenerated CeNi/Al<sub>2</sub>O<sub>3</sub>NP-IW and regenerated Ni/Al<sub>2</sub>O<sub>3</sub>NP-IW at 850 °C. Reaction conditions: catalyst loading of 0.070 g, 1.49 wt.% Ni, reactant composition of CH<sub>4</sub>/CO<sub>2</sub>=50/50 vol. %, and total flow rate of 60 mL/min.

## Thermodynamic analysis of phase transform during reaction

To figure out the reaction of solid phase change, Gibbs free energy was calculated using (equ.1) with the standard Gibbs free energy of formation based on Reference,<sup>2</sup> as shown in Figure S10.

The perovskite  $\text{CeAlO}_3$  was reported to be highly stable under a reducing atmosphere at high temperature. It was possible that  $\text{Ce}^{3+}$  ion doped into the  $\text{Al}_2\text{O}_3$  (R1) or  $\text{NiAl}_2\text{O}_4$  (R2) lattice and, thereby, formed a thermally stable  $\text{CeAlO}_3$ . During the latter process,  $\text{Ni}^{2+}$  ions might have been driven away from  $\text{NiAl}_2\text{O}_4$  and formed  $\text{NiO}$ , which would be easily reduced to metallic Ni during the DRM reaction; whereas the direct formation of  $\text{NiO}$  and  $\text{Al}_2\text{O}_3$  from the decomposition of  $\text{NiAl}_2\text{O}_4$  (R3), without  $\text{H}_2$ , would not have been favorable. This meant that  $\text{Ce}_2\text{O}_3$  generated from  $\text{CeO}_2$  might have assisted the reduction of  $\text{NiAl}_2\text{O}_4$  by forming a stable  $\text{CeAlO}_3$ .

$$\Delta G^\circ = \sum (\Delta G_f^\circ)_{\text{product}} - \sum (\Delta G_f^\circ)_{\text{reactant}} \quad (\text{equ. 1})$$

where the  $\Delta G^\circ$  stands for the reaction Gibbs free energy,  $(\Delta G_f^\circ)_{\text{product}}$  stands for the standard Gibbs free energy of the formation of product, and  $(\Delta G_f^\circ)_{\text{reactant}}$  stands for the standard Gibbs free energy of the formation of reactants.

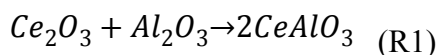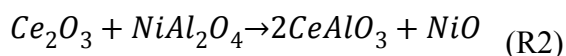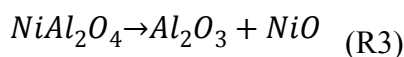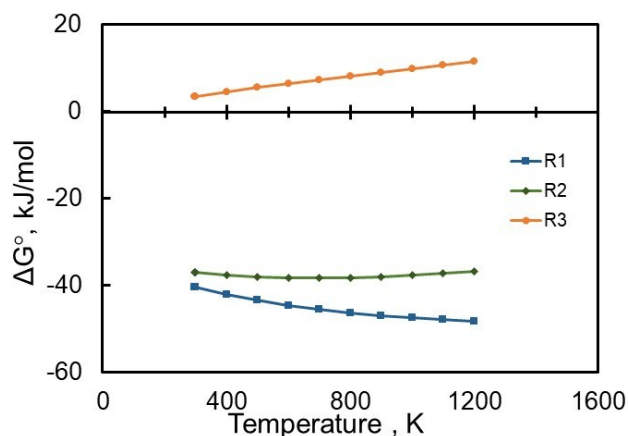

**Figure S10.** Gibbs free energy change as a function of temperature for solid phase reactions.

### Verification of the possibility of CeAlO<sub>3</sub> formation

To verify the possibility of CeAlO<sub>3</sub> formation under DRM reaction conditions, XRD (as shown in Figure S11a) was conducted on NiAl<sub>2</sub>O<sub>4</sub> (N1), CeO<sub>2</sub>-NiAl<sub>2</sub>O<sub>4</sub> (N2), and reduced CeO<sub>2</sub>-NiAl<sub>2</sub>O<sub>4</sub> (N3) as shown in Figure S11b. From Figure S11a, strong peaks for spinel NiAl<sub>2</sub>O<sub>4</sub> were found. The peaks at  $2\theta=31.5^\circ$ ,  $37.0^\circ$ ,  $45.0^\circ$ ,  $59.7^\circ$ , and  $65.6^\circ$  corresponded to the (220), (311), (400), (511), and (440) planes of NiAl<sub>2</sub>O<sub>4</sub>. As CeO<sub>2</sub> was introduced to NiAl<sub>2</sub>O<sub>4</sub> (CeO<sub>2</sub>-NiAl<sub>2</sub>O<sub>4</sub>, N2), the peaks for CeO<sub>2</sub> appeared, including peaks at  $2\theta=28.5^\circ$ ,  $47.6^\circ$ , and  $56.3^\circ$  for the (111), (220), and (311) planes of CeO<sub>2</sub>, respectively. When CeO<sub>2</sub>-NiAl<sub>2</sub>O<sub>4</sub> was reduced, strong peaks for the metallic Ni appeared, whereas the peak for NiAl<sub>2</sub>O<sub>4</sub> became much weaker, indicating the reduction of NiAl<sub>2</sub>O<sub>4</sub>. In addition, peaks at  $23.4^\circ$ ,  $33.4^\circ$ ,  $41.3^\circ$ ,  $60.0^\circ$ , and  $70.4^\circ$  were identified as the (001), (101), (111), (112), and (202) planes of CeAlO<sub>3</sub>, whereas the peaks for CeO<sub>2</sub> became weaker and no peaks were observed for Ce<sub>2</sub>O<sub>3</sub>. This confirmed the reduction of CeO<sub>2</sub> and the possibility of formation of CeAlO<sub>3</sub> during the reaction condition.

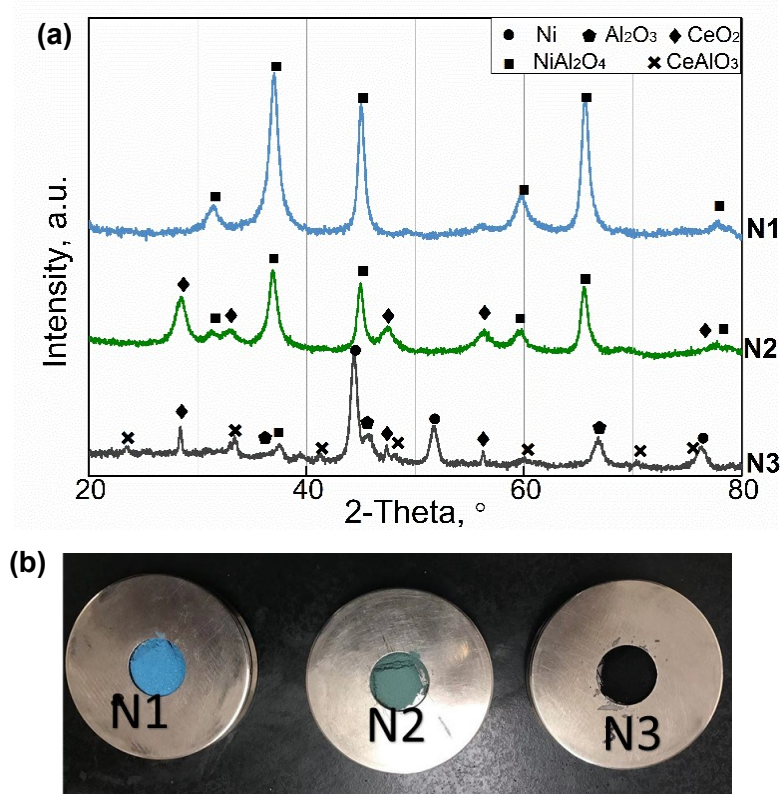

**Figure S11.** (a) XRD patterns and (b) pictures of NiAl<sub>2</sub>O<sub>4</sub> (N1), CeO<sub>2</sub>-NiAl<sub>2</sub>O<sub>4</sub> (N2), and reduced CeO<sub>2</sub>-NiAl<sub>2</sub>O<sub>4</sub> (N3).

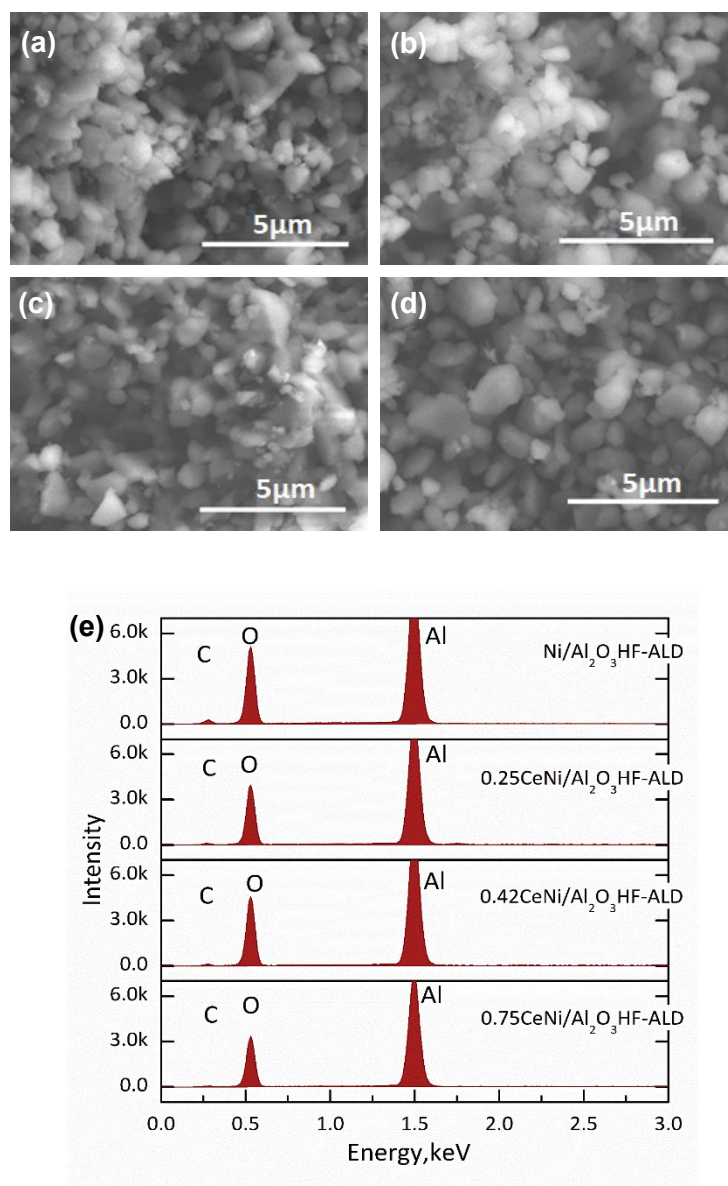

**Figure S12.** (a, b, c, d) SEM images of spent catalysts after two cycles of reaction and (e) EDS elemental analysis: (a) Ni/Al<sub>2</sub>O<sub>3</sub>HF-ALD, (b) 0.25CeNi/Al<sub>2</sub>O<sub>3</sub>HF-ALD, (c) 0.42CeNi/Al<sub>2</sub>O<sub>3</sub>HF-ALD, and (d) 0.75CeNi/Al<sub>2</sub>O<sub>3</sub>HF-ALD.

**Table S1.** Fitting results of XPS for NiAl<sub>2</sub>O<sub>3</sub>NP-ALD, CeNiAl<sub>2</sub>O<sub>3</sub>NP-ALD, spent NiAl<sub>2</sub>O<sub>3</sub>NP-ALD, and spent CeNiAl<sub>2</sub>O<sub>3</sub>NP-ALD, after DRM at 850 °C for 72 h.

| Sample                                        | Signal    | Position, eV | FWHM, eV | Atomic, % | Assignment                       |
|-----------------------------------------------|-----------|--------------|----------|-----------|----------------------------------|
| NiAl <sub>2</sub> O <sub>3</sub> NP-ALD       | C1s       | 284.5        | 1.6      | 71.6      | C=C                              |
|                                               |           | 286.3        | 1.6      | 15.8      | C-O                              |
|                                               |           | 288.5        | 1.6      | 12.6      | C=O                              |
|                                               | Ni 2p 3/2 | 853.2        | 2.2      | 4.9       | Ni                               |
|                                               |           | 855.2        | 2.2      | 31.8      | NiO                              |
|                                               |           | 856.4        | 2.2      | 17.5      | NiAl <sub>2</sub> O <sub>4</sub> |
|                                               |           | 858.8        |          | 8.1       | Ni(0) satellite                  |
|                                               |           | 861.2        |          | 37.6      | Ni(II) satellite                 |
|                                               | O 1s      | 530.5        | 1.6      | 65.8      | Lattice oxygen                   |
|                                               |           | 531.4        | 1.6      | 23.2      | Surface oxygen                   |
|                                               |           | 532.6        | 1.6      | 11.0      | Adsorbed oxygen                  |
| CeNiAl <sub>2</sub> O <sub>3</sub> NP-ALD     | C1s       | 284.5        | 1.6      | 75.5      | C=C                              |
|                                               |           | 286.1        | 1.6      | 11.4      | C-O                              |
|                                               |           | 288.4        | 1.6      | 12.1      | C=O                              |
|                                               | Ni 2p 3/2 | 854.3        | 2.3      | 35.8      | NiO                              |
|                                               |           | 856.0        | 2.3      | 20.8      | NiAl <sub>2</sub> O <sub>4</sub> |
|                                               |           | 860.8        |          | 43.4      | Ni(II) satellite                 |
|                                               | O 1s      | 530.1        | 1.6      | 59.1      | Lattice oxygen                   |
|                                               |           | 530.9        | 1.6      | 32.5      | Surface oxygen                   |
|                                               |           | 532.4        | 1.6      | 8.4       | Adsorbed oxygen                  |
|                                               | Ce 3d     | 881.4        | 2.6      | 22.7      | v, 3d 5/2, Ce <sup>4+</sup>      |
|                                               |           | 884.6        | 2.6      | 7.7       | v', 3d 5/2, Ce <sup>3+</sup>     |
|                                               |           | 887.6        |          | 13.1      | v'', 3d 5/2, satellite           |
|                                               |           | 897.4        |          | 16.5      | v''', 3d 5/2, satellite          |
|                                               |           | 900.0        | 2.6      | 15.2      | u, 3d 3/2, Ce <sup>4+</sup>      |
|                                               |           | 902.8        | 2.6      | 5.1       | u', 3d 3/2, Ce <sup>3+</sup>     |
|                                               |           | 906.3        |          | 8.7       | u'', 3d 3/2, satellite           |
|                                               |           | 915.8        |          | 11.0      | u''', 3d 3/2, satellite          |
| Spent NiAl <sub>2</sub> O <sub>3</sub> NP-ALD | C1s       | 284.5        | 1.4      | 83.6      | C=C                              |
|                                               |           | 286.1        | 1.4      | 10.9      | C-O                              |
|                                               |           | 288.3        | 1.4      | 5.5       | C=O                              |
|                                               | Ni 2p 3/2 | 852.6        | 2.0      | 39.4      | Ni                               |
|                                               |           | 854.6        | 2.0      | 7.3       | NiO                              |
|                                               |           | 856.1        | 2.0      | 20.5      | NiAl <sub>2</sub> O <sub>4</sub> |
|                                               |           | 858.4        |          | 20.7      | Ni(0) satellite                  |
|                                               |           | 861.5        |          | 12.2      | Ni(II) satellite                 |
|                                               | O 1s      | 530.6        | 1.6      | 77.8      | Lattice oxygen                   |
|                                               |           | 531.4        | 1.6      | 14.1      | Surface oxygen                   |
|                                               |           | 532.7        | 1.6      | 8.1       | Adsorbed oxygen                  |

|                                                 |           |       |     |      |                                  |
|-------------------------------------------------|-----------|-------|-----|------|----------------------------------|
| Spent CeNiAl <sub>2</sub> O <sub>3</sub> NP-ALD | C 1s      | 284.5 | 1.8 | 65.7 | C=C                              |
|                                                 |           | 286.1 | 1.8 | 21.5 | C-O                              |
|                                                 |           | 288.4 | 1.8 | 12.8 | C=O                              |
|                                                 | Ni 2p 3/2 | 852.3 | 2.0 | 29.2 | Ni                               |
|                                                 |           | 854.3 | 2.0 | 18.7 | NiO                              |
|                                                 |           | 856.1 | 2.0 | 12.4 | NiAl <sub>2</sub> O <sub>4</sub> |
|                                                 |           | 858.3 |     | 27.8 | Ni(0) satellite                  |
|                                                 |           | 861.3 |     | 12.0 | Ni(II) satellite                 |
|                                                 | O 1s      | 530.4 | 1.7 | 48.7 | Lattice oxygen                   |
|                                                 |           | 531.5 | 1.7 | 39.5 | Surface oxygen                   |
|                                                 |           | 532.6 | 1.7 | 11.8 | Adsorbed oxygen                  |
|                                                 | Ce 3d     | 881.4 | 2.6 | 20.8 | v, 3d 5/2, Ce <sup>4+</sup>      |
|                                                 |           | 884.8 | 2.6 | 27.4 | v', 3d 5/2, Ce <sup>3+</sup>     |
|                                                 |           | 886.7 |     | 4.6  | v'', 3d 5/2, satellite           |
|                                                 |           | 897.9 |     | 7.2  | v''', 3d 5/2, satellite          |
|                                                 |           | 900.2 | 2.6 | 13.9 | u, 3d 3/2, Ce <sup>4+</sup>      |
|                                                 |           | 903.3 | 2.6 | 18.3 | u', 3d 3/2, Ce <sup>3+</sup>     |
|                                                 |           | 906.2 |     | 3.0  | u'', 3d 3/2, satellite           |
|                                                 |           | 916.1 |     | 4.8  | u''', 3d 3/2, satellite          |

## References:

1. A. Remiro, A. Arandia, L. Oar-Arteta, J. Bilbao and A. G. Gayubo, *Appl. Catal. B: Environ*, 2018, **237**, 353-365.
2. B. Ihsan, *Thermochemical Data of Pure Substances, third ed.*, Weinheim, New York, 1995.
